# Supplementary material for: Implications of Lifestyle and Occupational Factors on the Risk of Breast Cancer in Shiftwork Nurses
Source: MDPI journal article supplement (doi:10.3390/healthcare9060649), 2021-05-30
Supplement: s1 [file s1]

**Table S1.** Shiftwork organization and characteristics [26,27,44,55,70]

| <b>Shiftwork organization</b>                                         |                                                                                                                                                                                                                                                                                                                                                                                                 |
|-----------------------------------------------------------------------|-------------------------------------------------------------------------------------------------------------------------------------------------------------------------------------------------------------------------------------------------------------------------------------------------------------------------------------------------------------------------------------------------|
| Permanent                                                             | People work regularly on one shift only, i.e., morning or afternoon or night.                                                                                                                                                                                                                                                                                                                   |
| Daytime work                                                          | Morning shift (08:00 AM – 03:00PM), afternoon/evening shift (03:00PM - 10:00 PM).                                                                                                                                                                                                                                                                                                               |
| Split shift                                                           | Working time in two periods each day (i.e., 4 hours in the morning and 4 hours at night).                                                                                                                                                                                                                                                                                                       |
| Night work*                                                           | In Spain, from 10:00 PM – 08:00 AM.                                                                                                                                                                                                                                                                                                                                                             |
| Rotating                                                              | People alternate working periodically on different shifts, always including nights (morning/night, afternoon/night, or morning/afternoon/night).                                                                                                                                                                                                                                                |
| <i>3-shift rotation</i>                                               | 24 hours divided into three 8-hour shifts. The day is divided into three working periods: morning, afternoon and night.                                                                                                                                                                                                                                                                         |
| <i>6x2 fast rotation</i>                                              | Two morning shifts (M), two afternoon shifts (A) and two night shifts (N). At the end of the cycle, 2 consecutive rest days (R). The result is MM-AA-NN-RR.                                                                                                                                                                                                                                     |
| <i>4x3 rotation</i>                                                   | 4 working days followed by 3 rest days.                                                                                                                                                                                                                                                                                                                                                         |
| <i>4x2 rotation</i>                                                   | 4 consecutive days working in 12 hour-shifts, followed by 2 rest days.                                                                                                                                                                                                                                                                                                                          |
| Continuous                                                            | All days of the week are covered                                                                                                                                                                                                                                                                                                                                                                |
| Discontinuous                                                         | Work does not occur every day of the week, i.e., no work during the weekends                                                                                                                                                                                                                                                                                                                    |
| With or without night work                                            | The working time can be extended to all or part of the night (at least 3 hours between midnight and 5:00 AM; between 10:00 PM and 06:00AM in Spain). The number of nights worked per week/month/year can vary considerably according to the speed of shift rotation. Periods of night work can vary:<br>10 hours: from 10:00 PM to 8:00 AM.<br>12 hours: from 7:00 - 8:00 PM to 7:00 - 8:00 AM. |
| <b>Characteristics of shift scheduling</b>                            |                                                                                                                                                                                                                                                                                                                                                                                                 |
| Duration of shifts                                                    | Shift length can range from 6 to 24 hours. The most common length of a shift is 8 hours. 12 hour- and 24 hour-shifts are also common                                                                                                                                                                                                                                                            |
| Speed of shift rotation                                               | Number of consecutive days worked in the same shift                                                                                                                                                                                                                                                                                                                                             |
| <i>Fast change</i>                                                    | Daily, or every 2 or 3 days.<br>It indicates fewer consecutive night shifts than other groups.                                                                                                                                                                                                                                                                                                  |
| <i>Intermediate</i>                                                   | Weekly.                                                                                                                                                                                                                                                                                                                                                                                         |
| <i>Slow</i>                                                           | Every 15, 20 or 30 days.                                                                                                                                                                                                                                                                                                                                                                        |
| Direction of shift rotation:                                          | The schedule moves to a phase delay or a phase advance rotation.                                                                                                                                                                                                                                                                                                                                |
| <i>Forward rotation</i>                                               | Morning/afternoon/night                                                                                                                                                                                                                                                                                                                                                                         |
| <i>Backward rotation</i>                                              | Night/afternoon/morning                                                                                                                                                                                                                                                                                                                                                                         |
| Length of shift cycle according to a cyclic programming:              | Pre-set planning of shifts and breaks distributed equally among staff members.                                                                                                                                                                                                                                                                                                                  |
| <i>Short length</i>                                                   | Cycles change every 6–9 days.                                                                                                                                                                                                                                                                                                                                                                   |
| <i>Intermediate</i>                                                   | Cycles change every 20–30 days.                                                                                                                                                                                                                                                                                                                                                                 |
| <i>Long</i>                                                           | Cycles change every 6 months or more.                                                                                                                                                                                                                                                                                                                                                           |
| <i>Irregular</i>                                                      | No cyclic programming.                                                                                                                                                                                                                                                                                                                                                                          |
| Correspondence of rest days along the shift cycle and between shifts: | Number and position of rest days/hours between shifts.                                                                                                                                                                                                                                                                                                                                          |
| Compressed week schedules                                             | The standard work week is reduced to fewer than 5 days by increasing the working hours each day (e.g., four 10-hour days or three 12-hour days)                                                                                                                                                                                                                                                 |

- [26] IARC Working Group on the Evaluation of Carcinogenic Risks to Humans. Painting, firefighting and shiftwork. Vol. 98. Lyon (FR): International Agency for Research on Cancer; 2010.
- [27] IARC Working Group on the Identification of Carcinogenic Hazards to Humans. Night shift work. Vol. 124. Lyon (FR): International Agency for Research on Cancer. 2020.
- [44] Peplonska B, Bukowska A, Lie JAS, Gromadzinska J, Zienolddiny S. Night shift work and other determinants of estradiol, testosterone, and dehydroepiandrosterone sulfate among middle-aged nurses and midwives. *Scand J Work Environ Health*. 2016. 42(5):435-446. doi: 10.5271/sjweh.3581
- [55] McElvenny DM, Crawford JO, Davis A, Dixon K, Alexander C, Cowie H, Cherrie JW; The Institution of Occupational Safety and Health Board (IOSH). A review of the impact of shift work on occupational cancer. Wigston (UK): IOSH, 2018. Available at: <https://www.iosh.co.uk/shiftworkreview> (accessed on 31 March 2021).
- [70] Directiva 2003/88/CE del Parlamento Europeo y del Consejo, de 4 de noviembre de 2003, relativa a determinados aspectos de la ordenación del tiempo de trabajo. Ref: DOUE-L-2003-81852. Available at: <https://www.boe.es/doue/2003/299/L00009-00019.pdf> (accessed on 31 March 2021).
