# Supplementary material for: Implications of Lifestyle and Occupational Factors on the Risk of Breast Cancer in Shiftwork Nurses
Source: MDPI journal article supplement (doi:10.3390/healthcare9060649), 2021-05-30
Supplement: s1 [file s1]

Table S2. Sex categorized descriptive analysis.

|                                         | N (%)          | Female (%)<br>(N=502) | Male (%)<br>(N=56) | $\chi^2$ | p    | Odds Ratio<br>(CI=95%) |
|-----------------------------------------|----------------|-----------------------|--------------------|----------|------|------------------------|
| Sex                                     |                |                       |                    |          |      |                        |
| Breast cancer cases                     | 56 (10.0)      | 91.1                  | 8.9                | .144     | .705 | 1.204                  |
| Healthy cases                           | 502 (90.0)     | 89.4                  | 10.6               |          |      | (.460, 3.150)          |
| Age                                     |                |                       |                    |          |      |                        |
| 41 or younger                           | 281 (50.4)     | 93.6                  | 6.4                | 9.669    | .002 | 2.466                  |
| Older than 41                           | 277 (49.6)     | 85.6                  | 14.4               |          |      | (1.376, 4.419)         |
| Marital relationship                    |                |                       |                    |          |      |                        |
| With partner                            | 317 (56.8)     | 87.7                  | 12.3               | 2..871   | .090 | .610                   |
| Single                                  | 241 (43.2)     | 92.1                  | 7.9                |          |      | (.343, 1.085)          |
| Children under 14 years                 |                |                       |                    |          |      |                        |
| Yes                                     | 225 (40.3)     | 88.9                  | 11.1               | .208     | .648 | .880                   |
| No                                      | 333 (59.7)     | 90.1                  | 9.9                |          |      | (.508, 1.525)          |
| Care for dependents at home             |                |                       |                    |          |      |                        |
| Yes                                     | 58 (10.4)      | 93.1                  | 6.9                | .850     | .356 | 1.635                  |
| No                                      | 500 (89.6)     | 89.2                  | 10.8               |          |      | (.570, 4.690)          |
| Mammography (N=497)                     |                |                       |                    |          |      |                        |
| Yes                                     | 211 (42.5)     | 91.9                  | 8.1                | 2.986    | .084 | 1.696                  |
| Never                                   | 286 (57.5)     | 87.1                  | 12.9               |          |      | (.927, 3.103)          |
| Family history of cancer (N=551)        |                |                       |                    |          |      |                        |
| Yes                                     | 72 (13.1)      | 93.1                  | 6.9                | .850     | .356 | 1.562                  |
| No                                      | 479 (86.9)     | 89.6                  | 10.4               |          |      | (.601, 4.057)          |
| BMI                                     |                |                       |                    |          |      |                        |
| Underweight                             | 10 (1.8)       | 80.0                  | 20.0               | 2.918    | .404 |                        |
| Normal                                  | 376 (67.4)     | 91.0                  | 9.0                |          |      | -                      |
| Overweight                              | 128 (22.9)     | 86.7                  | 13.3               |          |      |                        |
| Obese                                   | 44 (7.9)       | 88.6                  | 11.4               |          |      |                        |
| Physical activity at work               |                |                       |                    |          |      |                        |
| Light                                   | 124 (22.2)     | 91.9                  | 8.1                | 2.207    | .531 |                        |
| Moderate                                | 313 (56.1)     | 89.1                  | 10.9               |          |      | -                      |
| Hard                                    | 113 (20.3)     | 87.6                  | 12.4               |          |      |                        |
| Very hard                               | 8 (1.4)        | 100.0                 | 0                  |          |      |                        |
| Physical activity during leisure time   |                |                       |                    |          |      |                        |
| Two hours or less                       | 286<br>(51.25) | 88.5                  | 11.5               | .825     | .364 | .776                   |
| More than 2 hours                       | 272<br>(28.75) | 90.8                  | 9.2                |          |      | (.448, 1.343)          |
| Tobacco consumption                     |                |                       |                    |          |      |                        |
| Yes                                     | 301 (53.9)     | 89.0                  | 11.0               | .227     | .634 | .875                   |
| No                                      | 257 (46.1)     | 90.3                  | 9.7                |          |      | (.506, 1.515)          |
| Compliance with the smoking ban at work |                |                       |                    |          |      |                        |
| Totally                                 | 124 (22.2)     | 94.4                  | 5.6                | 3.899    | .273 |                        |
| Almost always                           | 239 (42.8)     | 88.3                  | 11.7               |          |      | -                      |
| Hardly ever                             | 141 (25.3)     | 87.9                  | 12.1               |          |      |                        |
| Never                                   | 54 (9.7)       | 88.9                  | 11.1               |          |      |                        |

|                                                   |            |       |       |       |      |       |               |
|---------------------------------------------------|------------|-------|-------|-------|------|-------|---------------|
| Exposition to tobacco smoke at home               |            |       |       |       |      |       |               |
| More than 5 hours a day                           | 22 (3.9)   | 77.3  | 22.7  | 4.150 | .246 |       |               |
| Between 1 and 5 hours a day                       | 36 (6.5)   | 88.9  | 11.1  |       |      |       |               |
| Less than 1 hour a day                            | 42 (7.5)   | 92.9  | 7.1   |       |      |       | -             |
| Never or hardly ever                              | 458 (82.1) | 90.0  | 10.0  |       |      |       |               |
| Use of medication to sleep                        |            |       |       |       |      |       |               |
| Yes                                               | 116 (20.8) | 86.2  | 13.8  | 1.816 | .178 | .656  |               |
| No                                                | 442 (79.2) | 90.5  | 9.5   |       |      |       | (.354, 1.215) |
| Hormone-based oral contraceptives (N=504)         |            |       |       |       |      |       |               |
| Yes                                               | 334 (66.3) | 90.4  | 9.6   | 2.950 | .086 | 1.626 |               |
| Never                                             | 170 (33.7) | 85.3  | 14.7  |       |      |       | (.930, 2.849) |
| Shift work at this moment                         |            |       |       |       |      |       |               |
| No                                                | 114 (20.4) | 86,8% | 13,2% | 1.175 | .278 | .708  |               |
| Yes                                               | 444 (79.6) | 90,3% | 9,7%  |       |      |       | (.378, 1.326) |
| Night work at this moment                         |            |       |       |       |      |       |               |
| No                                                | 180 (32.3) | 86,7% | 13,3% | 2.464 | .116 | .642  |               |
| Yes                                               | 378 (67.7) | 91,0% | 9,0%  |       |      |       | (.369, 1.120) |
| Working experience                                |            |       |       |       |      |       |               |
| 16 years or less                                  | 280 (50.2) | 90.4  | 9.6   | .341  | .559 | 1.176 |               |
| More than 16 years                                | 278 (49.8) | 88.8  | 11.2  |       |      |       | (.682, 2.028) |
| Total years performing more than 3 nights a month |            |       |       |       |      |       |               |
| 10 years or less                                  | 317 (56.8) | 90,2% | 9,8%  | .298  | .585 | 1.164 |               |
| More than 10 years                                | 241 (43.2) | 88,8% | 11,2% |       |      |       | (.675, 2.008) |
| Total worked nights                               |            |       |       |       |      |       |               |
| Less than 500 night                               | 265 (47.5) | 89.4  | 10.6  | .016  | .899 | 1.036 |               |
| 500 night or more                                 | 293 (52.5) | 89.8  | 10.2  |       |      |       | (.601, 1.785) |
| Total sick leaves over lifespan (N=550)           |            |       |       |       |      |       |               |
| 2 or less                                         | 342 (62.2) | 89.8  | 10.2  | .093  | .760 | 1.091 |               |
| More than 2                                       | 208 (37.8) | 88.9  | 11.1  |       |      |       | (.625, 1.903) |
| Sick leaves in the last year (N=554)              |            |       |       |       |      |       |               |
| Without sick leave                                | 385 (69.5) | 90.1  | 9.9   | .240  | .624 | 1.157 |               |
| With sick leave                                   | 169 (30.5) | 88.8  | 11.2  |       |      |       | (.646, 2.072) |
